# Supplementary material for: Thieno[3,4-c]pyrrole-4,6-dione as novel building block for host materials for red PhOLEDs
Source: Royal Society of Chemistry journal article supplement (doi:10.1039/c6tc05248g), 2017-01-01
Supplement: c6tc05248g1.pdf [file c6tc05248g1.pdf]

# Thieno[3,4-*c*]pyrrole-4,6-dione as novel building block for host materials for red PhOLEDs

## Supporting Information

Paul Kautny,<sup>\*a</sup> Chenyang Zhao,<sup>b</sup> Dominik Schopf,<sup>a</sup> Berthold Stöger,<sup>c</sup> Ernst Horkel,<sup>a</sup> Jiangshan Chen,<sup>\*b</sup> Dongge Ma,<sup>b</sup> Johannes Fröhlich<sup>a</sup> and Daniel Lumpi<sup>a</sup>

<sup>a</sup> Institute of Applied Synthetic Chemistry, TU Wien, Getreidemarkt 9/163, A-1060 Vienna, Austria; E-mail: paul.kautny@tuwien.ac.at

<sup>b</sup> State Key Laboratory of Polymer Physics and Chemistry, Changchun Institute of Applied Chemistry, Chinese Academy of Sciences, Changchun, 130022, China; E-mail: jschen@ciac.ac.cn

<sup>c</sup> Institute of Chemical Technologies and Analytics, TU Wien, Getreidemarkt 9/164, A-1060 Vienna, Austria

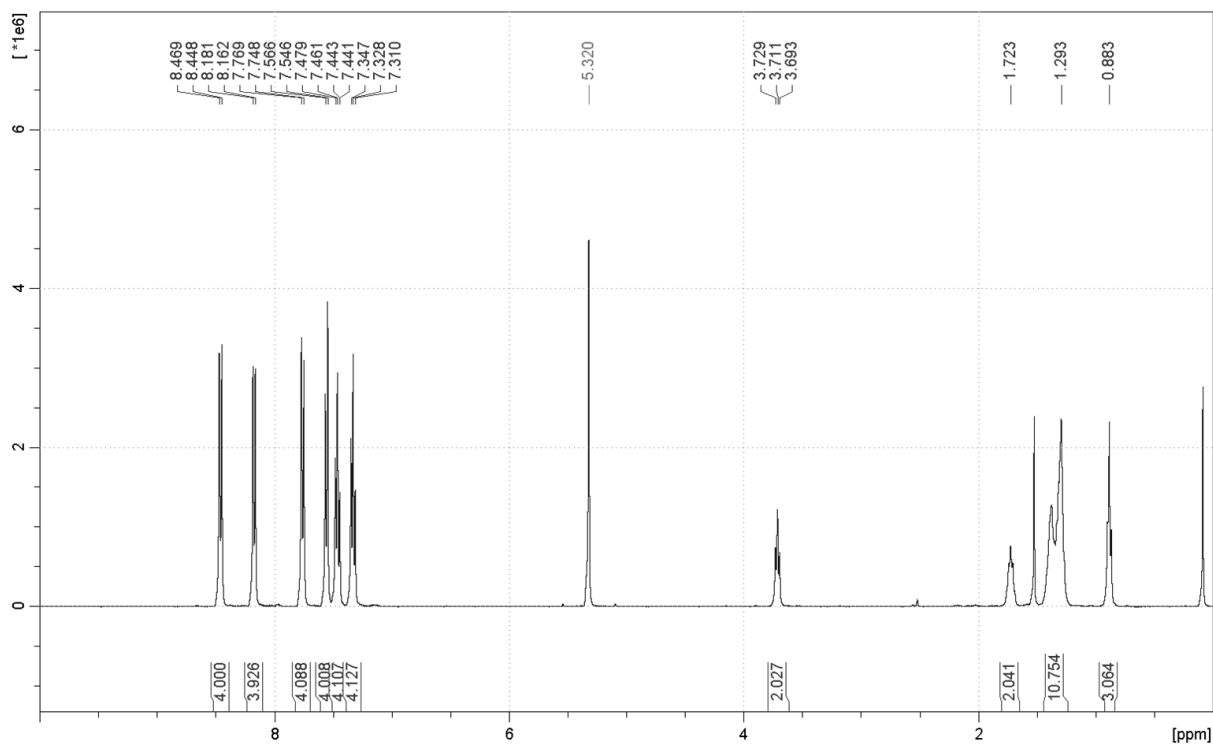

Fig. S1 Proton NMR spectrum of *p*-PCzTPD.

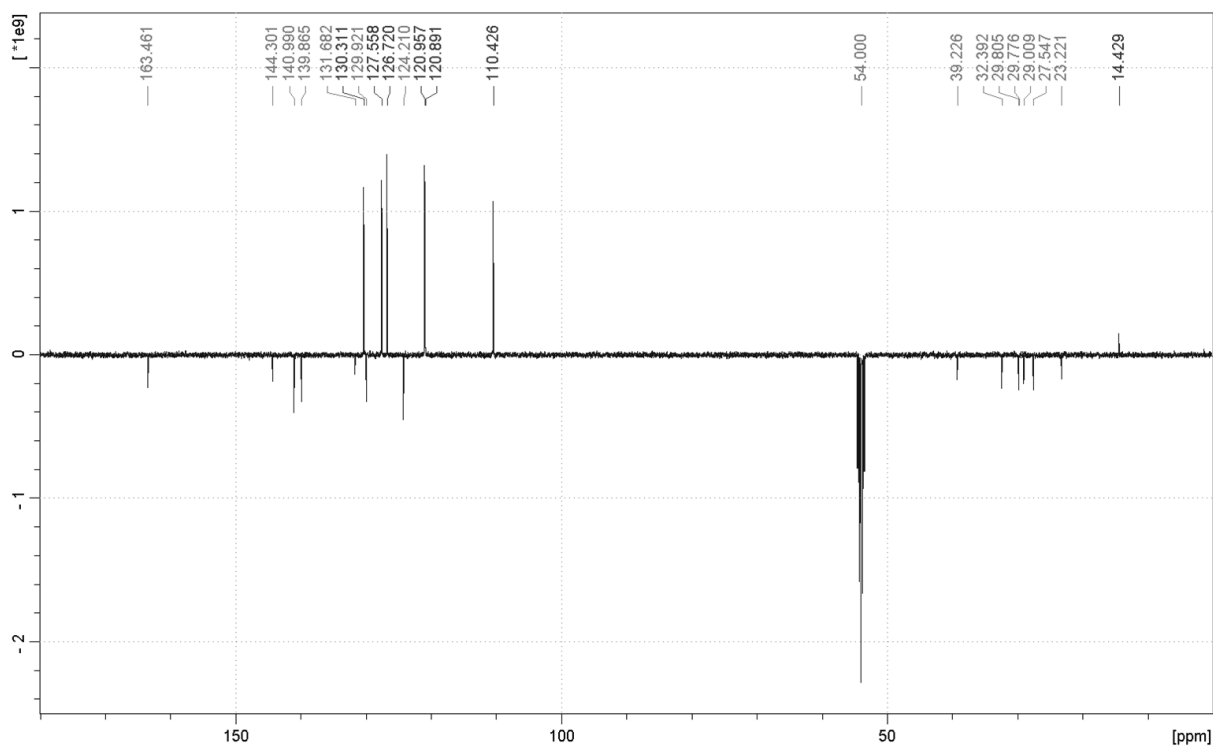

Fig. S2 Carbon NMR spectrum of *p*-PCzTPD.

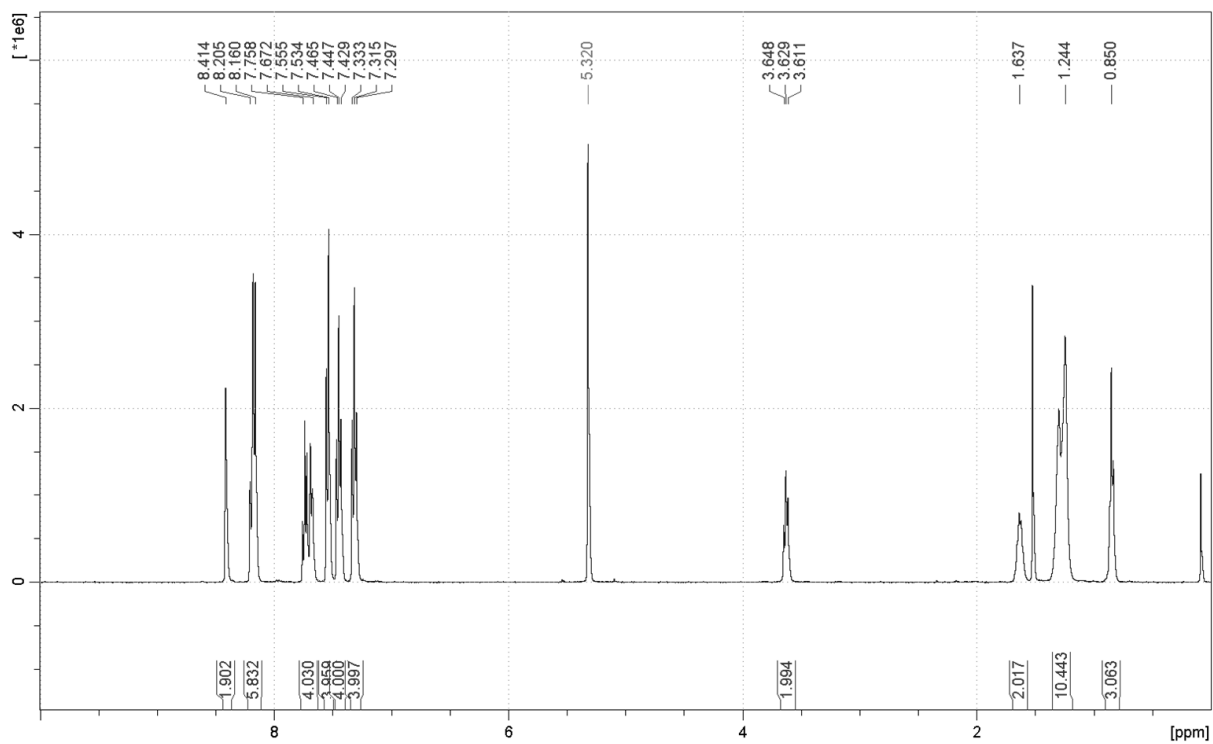

Fig. S3 Proton NMR spectrum of *m*-PCzTPD.

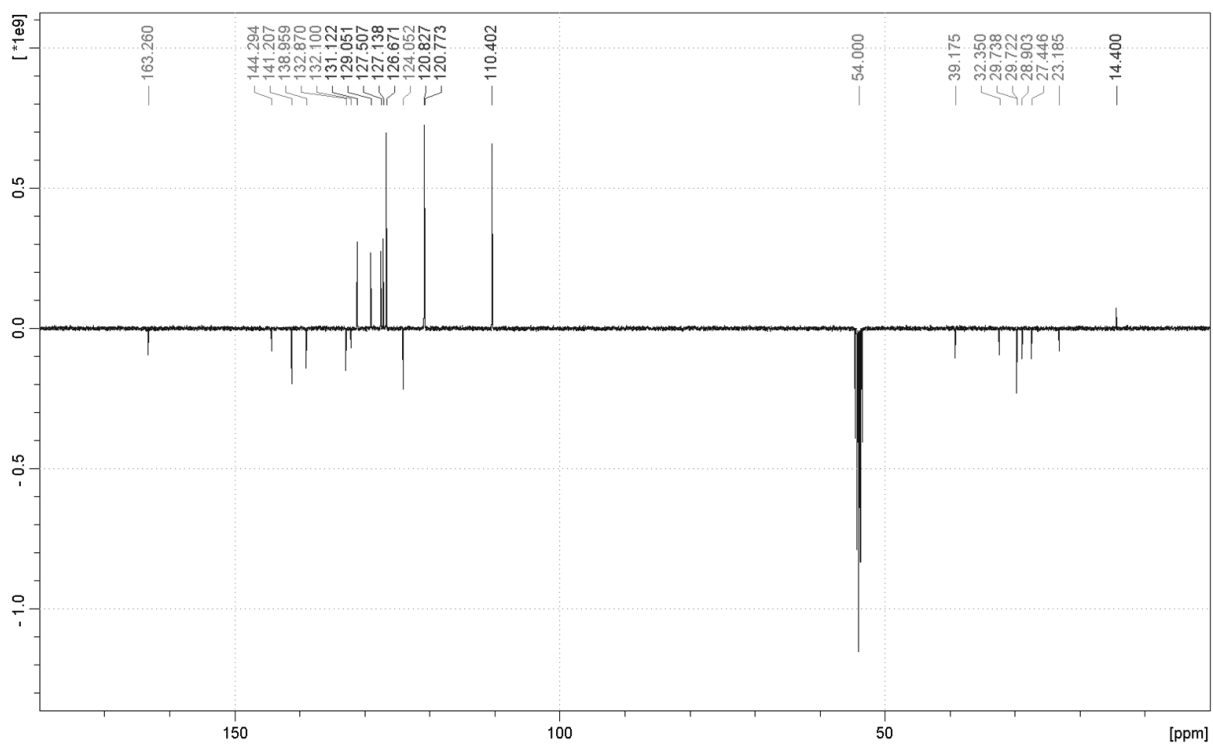

Fig. S4 Carbon NMR spectrum of *m*-PCzTPD.

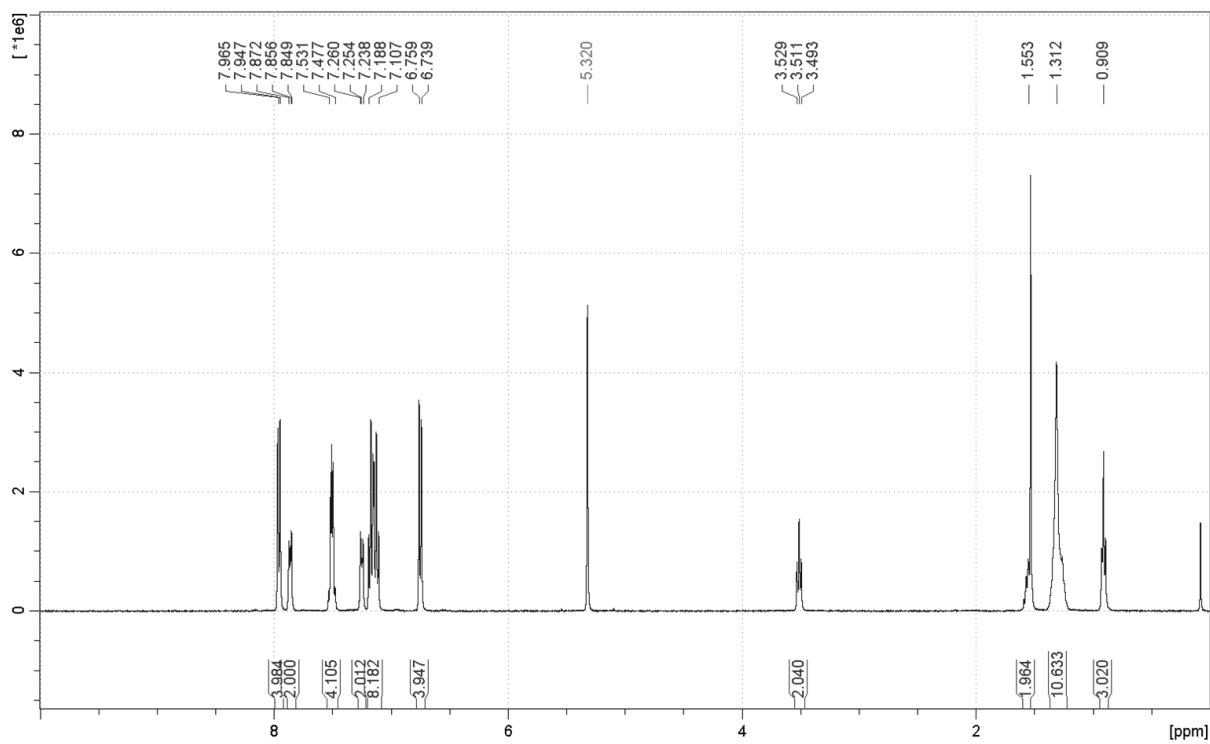

Fig. S5 Proton NMR spectrum of *o*-PCzTPD.

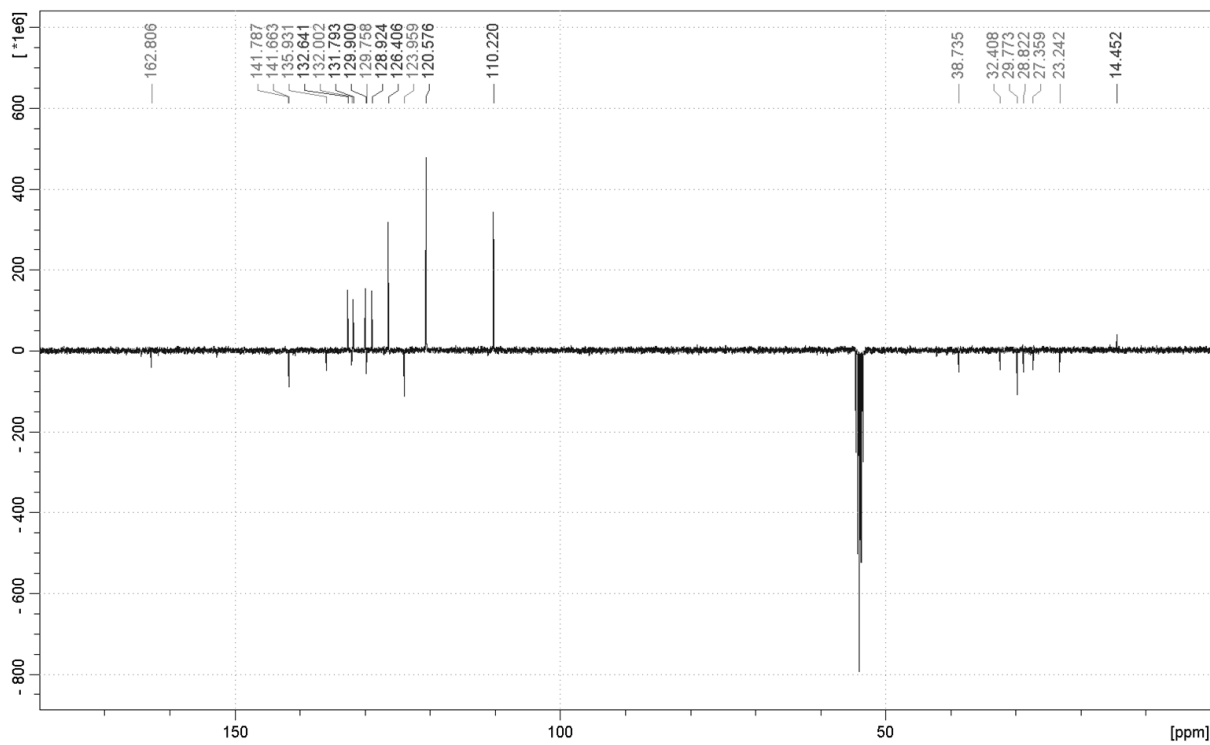

Fig. S6 Carbon NMR spectrum of *p*-PCzTPD.

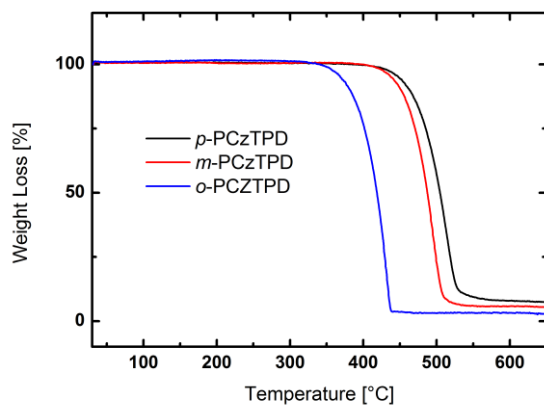

**Fig. S8** TGA analysis of the developed materials.

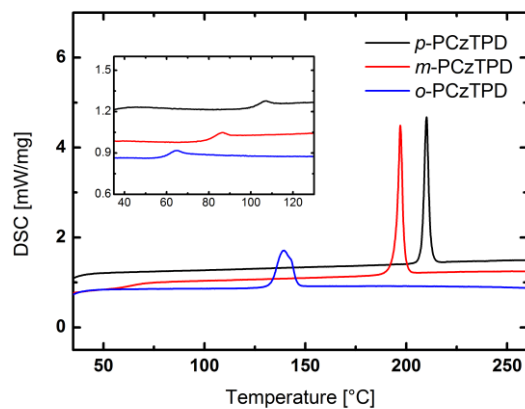

**Fig. S7** DSC analysis of the developed materials.

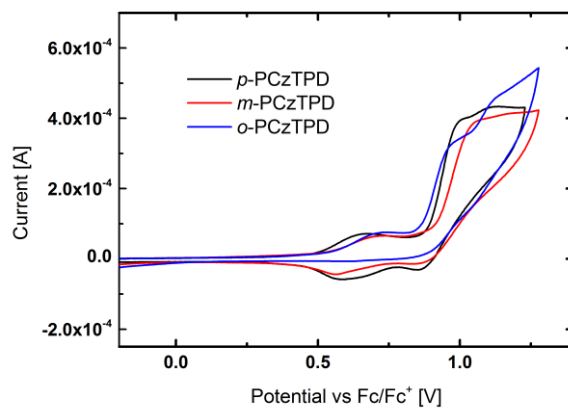

**Fig. S9** CV curves of the developed materials.

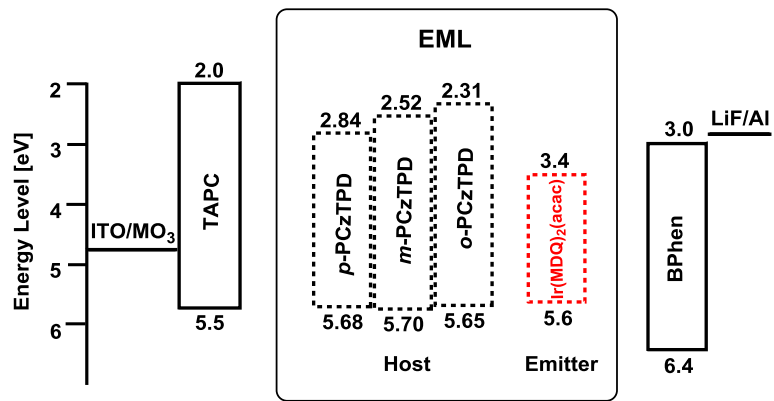

**Fig. S10** Energy level diagram of the PhOLED devices.

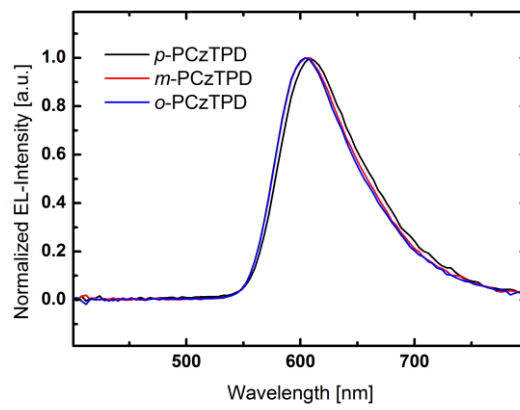

**Fig. S11** EL spectra of the PhOLED devices.
